# Supplementary material
Source: Springer Nature journal article supplement (https://www.springermedizin.de/resource/supplementary/13054_2010_8693_MOESM1_ESM.pdf/9732800)

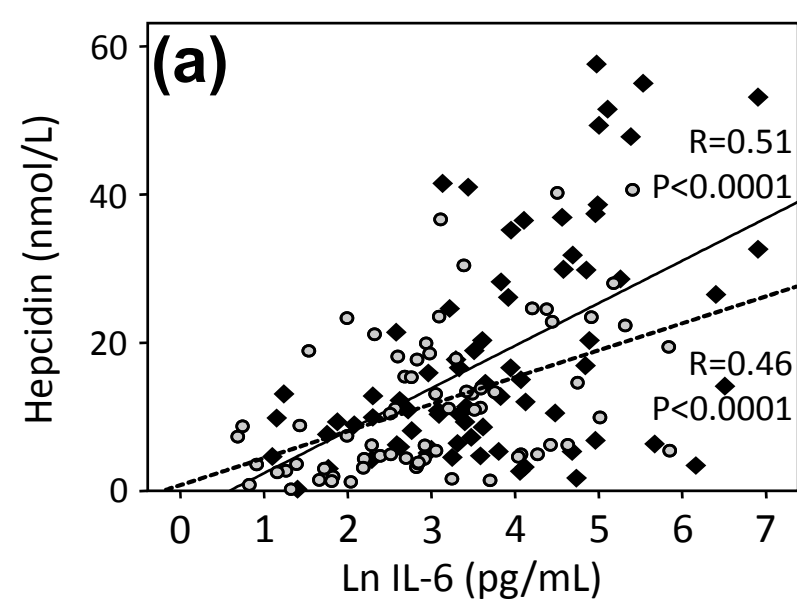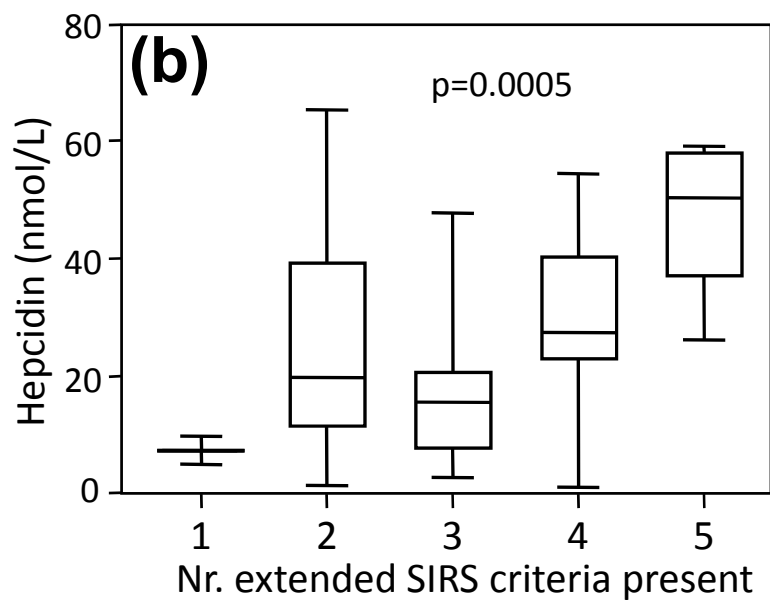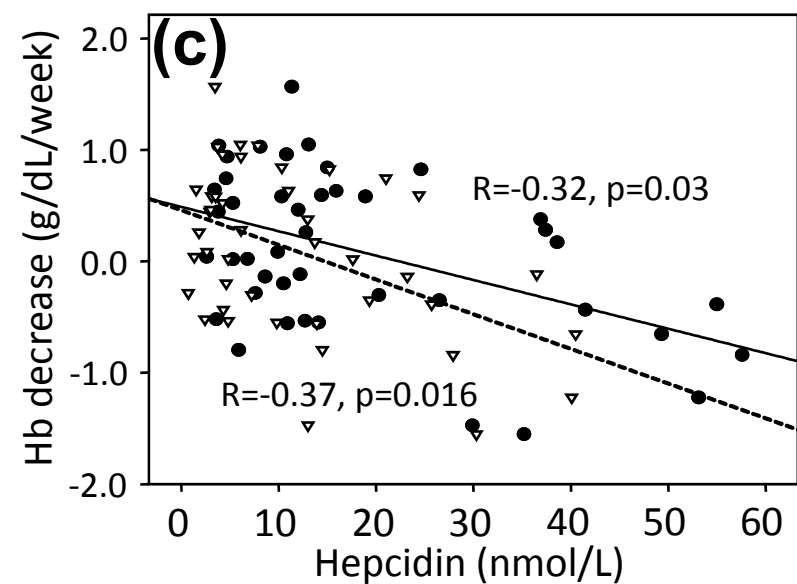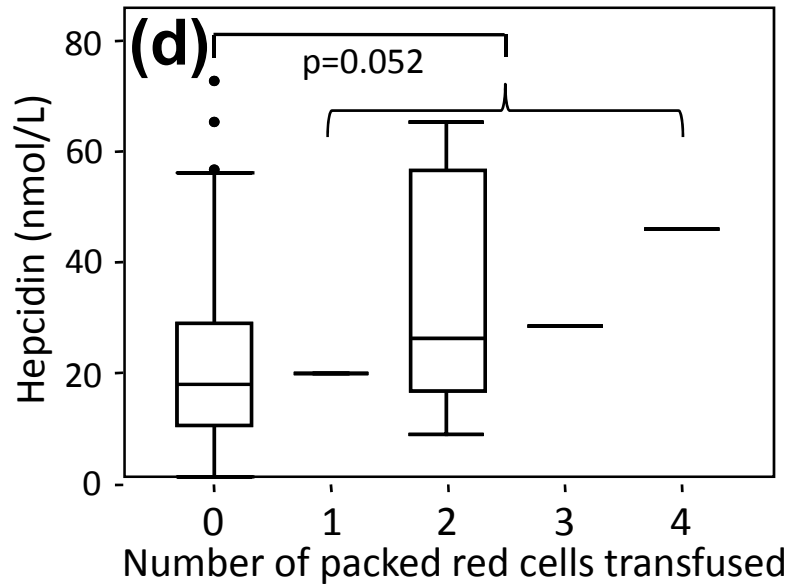

Supplement: MOESM1 [file 9732800]
